# Supplementary material
Source: PubMed Central journal article supplement (PMC10991882)

A

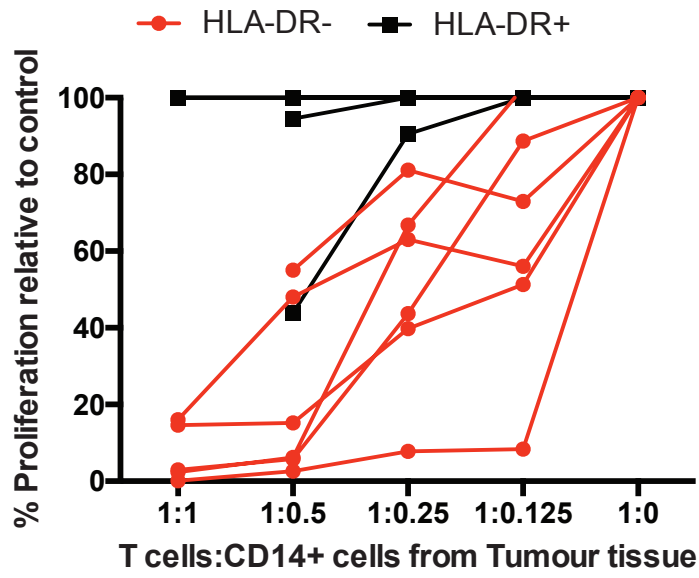

B

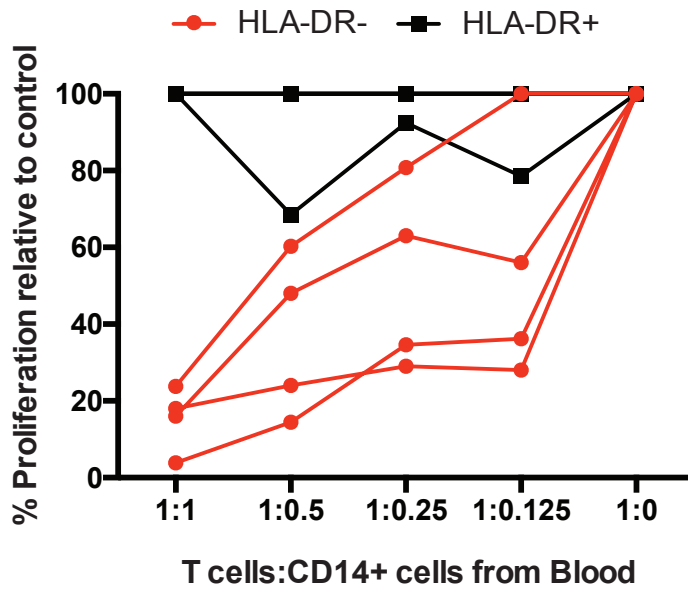

C

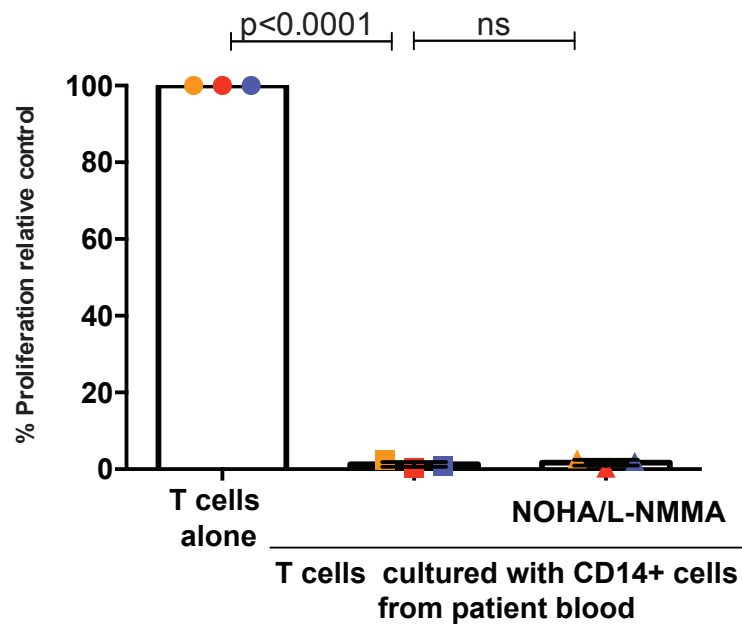

Supplement: 262_2021_3081_MOESM3_ESM.pdf [file 262_2021_3081_MOESM3_ESM.pdf]
