# Supplementary material
Source: PubMed Central journal article supplement (PMC10991882)

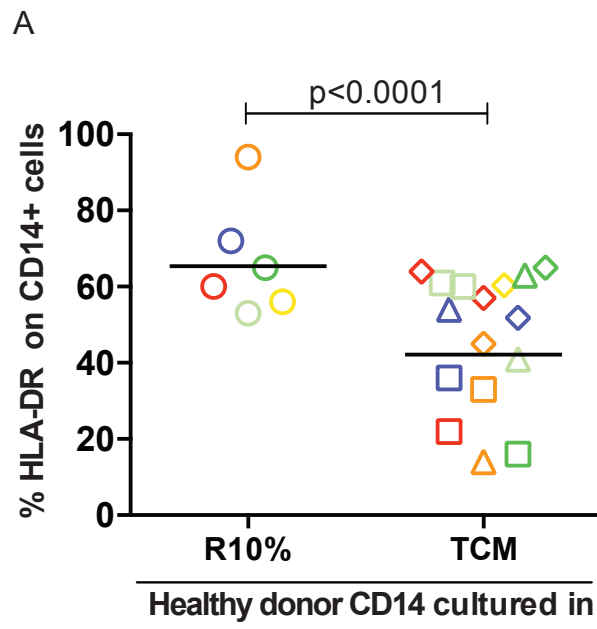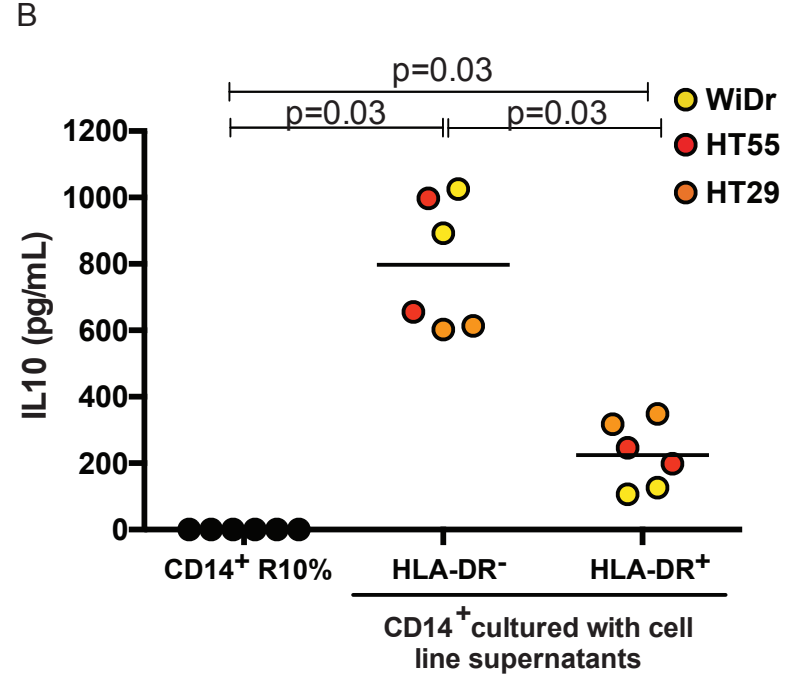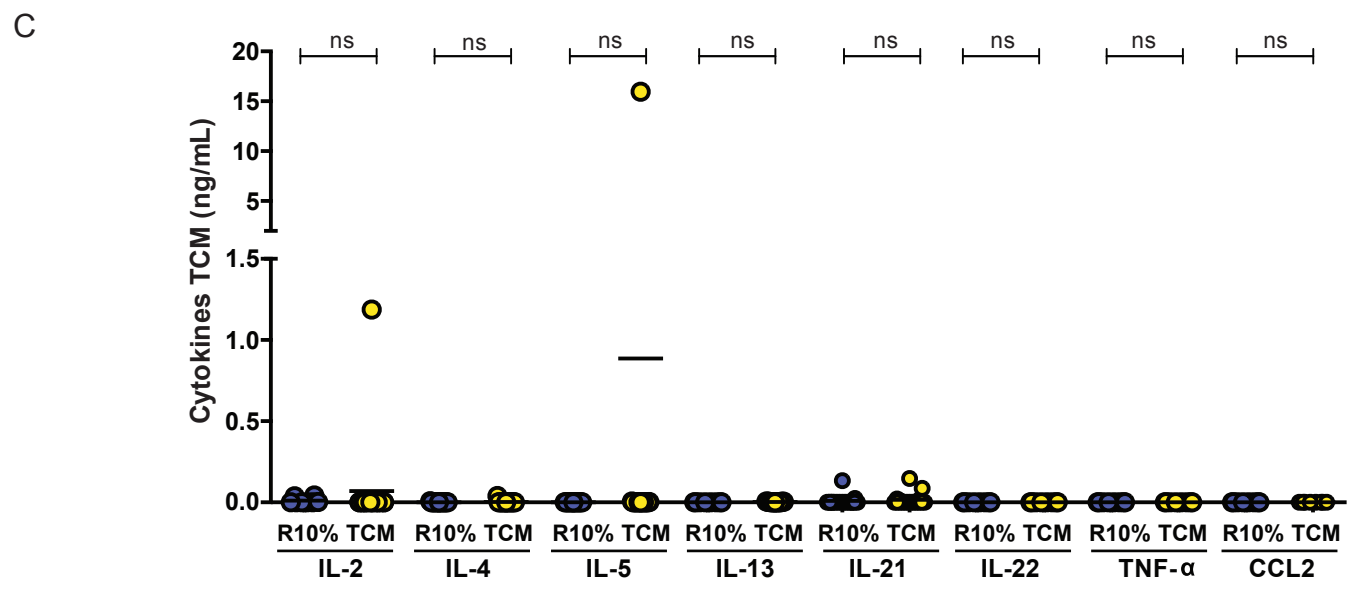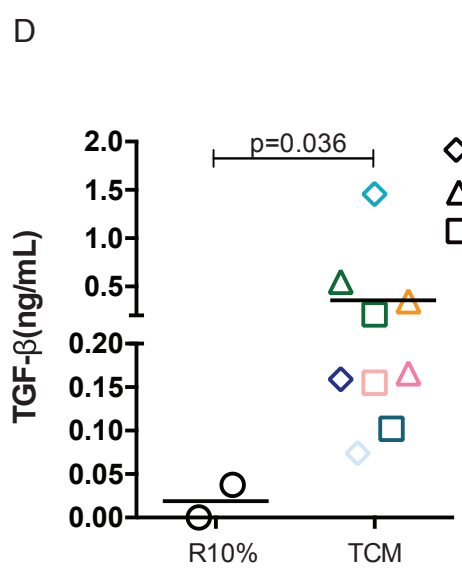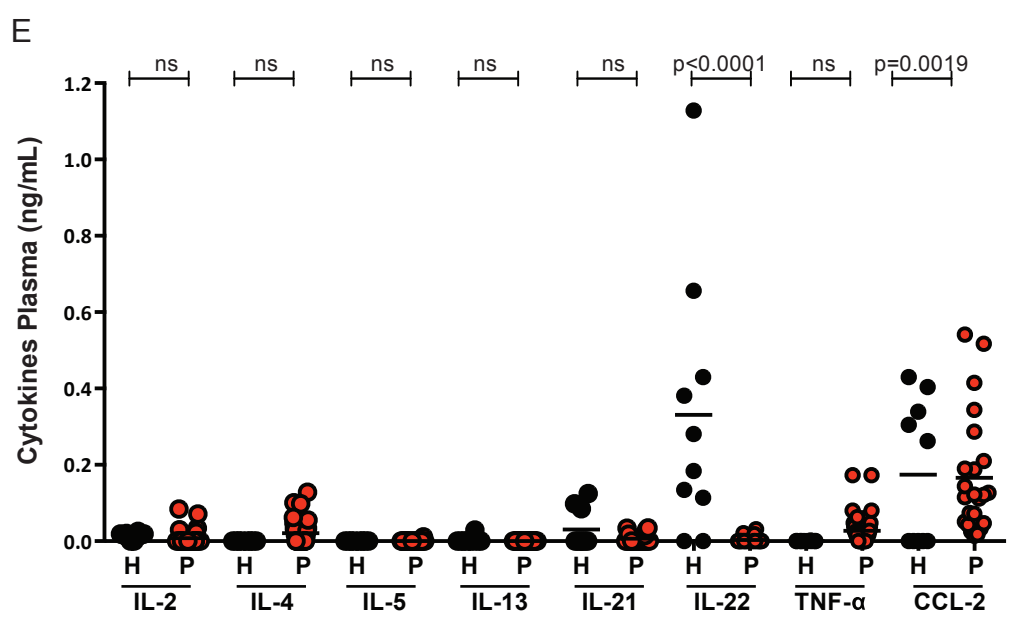

Supplement: 262_2021_3081_MOESM4_ESM.pdf [file 262_2021_3081_MOESM4_ESM.pdf]
